# Supplementary material
Source: publisher site journal article supplement (https://www.dovepress.com/article/476458)
Supplement: Supplementary file 1 [file 476458-Supplement-Table-1.pdf › 476458-Supplement-Table-1.pdf]

**Supplemental Table 1-1 Power analysis of the experiment data**

| Figure                              |                                     |      | Number of rats in each panel (n) |    |     |    | Power |
|-------------------------------------|-------------------------------------|------|----------------------------------|----|-----|----|-------|
|                                     |                                     |      | I                                | II | III | IV |       |
| Fig. 1A Zea-Longa score             |                                     | MCAO | 10                               | 10 | 10  | 10 | 0.999 |
| Fig. 1D TTC staining                |                                     | MCAO | 6                                | 6  | 6   | 6  | 0.969 |
| Fig. 2A Western blot                | Fig. 2A GSDMD                       | MCAO | 4                                | 4  | 4   | 4  | 0.940 |
|                                     | Fig. 2A N-terminal GSDMD            |      | 3                                | 3  | 3   | 3  | 0.816 |
| Fig. 2B qRT-PCR                     | Fig. 2B GSDMD mRNA                  | MCAO | 4                                | 4  | 4   | 4  | 0.807 |
| Fig.2C-DImmunofluorescence staining | Fig2D Relative GSDMD positive cells | MCAO | 5                                | 5  | 5   | 5  | 0.911 |
| Fig. 4A Western blot                | Fig. 4A NLRP3                       | MCAO | 3                                | 3  | 3   | 3  | 0.992 |
|                                     | Fig. 4A Pro-caspase1                |      | 4                                | 4  | 4   | 4  | 0.919 |
|                                     | Fig. 4A Cleaved caspase1            |      | 4                                | 4  | 4   | 4  | 0.905 |
|                                     | Fig. 4A Mature IL-18                |      | 4                                | 4  | 4   | 4  | 0.927 |
|                                     | Fig. 4A Mature IL-1 $\beta$         |      | 4                                | 4  | 4   | 4  | 0.999 |
| Fig. 4B qRT-PCR                     | Fig. 4B NLRP3 mRNA                  | MCAO | 4                                | 4  | 4   | 4  | 0.812 |
| Fig.4C-DImmunofluorescence staining | Fig4D Relative NLRP3 positive cells | MCAO | 5                                | 5  | 5   | 5  | 0.912 |
| Fig. 6A Western blot                | Fig. 6A AGEs                        | MCAO | 3                                | 3  | 3   | 3  | 0.851 |
|                                     | Fig 6A RAGE                         |      | 4                                | 4  | 4   | 4  | 0.956 |
| Fig. 6B qRT-PCR                     | Fig6B RAGE mRNA                     | MCAO | 4                                | 4  | 4   | 4  | 0.830 |
| Fig.6DImmunohistochemical staining  | Fig. 6C RAGE IOD                    | MCAO | 5                                | 5  | 5   | 5  | 0.909 |

**Note:** I . WT Sham, II . WT MCAO, III. *Lepr*<sup>-/-</sup> Sham, IV. *Lepr*<sup>-/-</sup> MCAO.

**Supplemental Table 1-2 Power analysis of the experiment data**

| Figure                  |                             |        | Number of rats in each panel (n) |    |     | Power |
|-------------------------|-----------------------------|--------|----------------------------------|----|-----|-------|
|                         |                             |        | I                                | II | III |       |
| Fig. 5A Zea-Longa score |                             | MCC950 | 10                               | 10 | 10  | 0.873 |
| Fig. 5C Western blot    | Fig. 5C Pro-caspase1        | MCC950 | 4                                | 4  | 4   | 0.935 |
|                         | Fig. 5C Cleaved caspase1    |        | 3                                | 3  | 3   | 0.934 |
|                         | Fig. 5C Mature IL-18        |        | 4                                | 4  | 4   | 0.919 |
|                         | Fig. 5C Mature IL-1 $\beta$ |        | 3                                | 3  | 3   | 0.972 |
|                         | Fig. 5CGSDMD                |        | 3                                | 3  | 3   | 0.863 |
|                         | Fig. 5C N-terminal GSDMD    |        | 3                                | 3  | 3   | 0.995 |

**Note:** I . *Lepr*<sup>-/-</sup> MCAO, II . DMSO+ *Lepr*<sup>-/-</sup> MCAO, III . MCC950+ *Lepr*<sup>-/-</sup> MCAO.

**Supplemental Table 1-3 Power analysis of the experiment data**

|                                      | Figure                              |         | Number of rats in each panel (n) |    |     | Power |
|--------------------------------------|-------------------------------------|---------|----------------------------------|----|-----|-------|
|                                      |                                     |         | I                                | II | III |       |
| Fig. 7A Zea-Longa score              |                                     | FPS-ZM1 | 10                               | 10 | 10  | 0.886 |
| Fig. 7C-D Western blot               | Fig. 7C NLRP3                       | FPS-ZM1 | 4                                | 4  | 4   | 0.994 |
|                                      | Fig. 7C Pro-caspase1                |         | 4                                | 4  | 4   | 0.910 |
|                                      | Fig. 7C Cleaved caspase1            |         | 3                                | 3  | 3   | 0.963 |
|                                      | Fig. 7C Mature IL-1 $\beta$         |         | 4                                | 4  | 4   | 0.938 |
|                                      | Fig. 7D GSDMD                       |         | 4                                | 4  | 4   | 0.972 |
|                                      | Fig. 7D N-terminal GSDMD            |         | 3                                | 3  | 3   | 0.971 |
|                                      | Fig. 7D Mature IL-18                |         | 3                                | 3  | 3   | 0.931 |
| Fig.8B-D Immunofluorescence staining | Fig8B Relative NLRP3 positive cells | FPS-ZM1 | 5                                | 5  | 5   | 0.814 |
|                                      | Fig8D Relative GSDMD positive cells |         | 5                                | 5  | 5   | 0.836 |

**Note:** I. *Lepr*<sup>-/-</sup> MCAO, II. *Lepr*<sup>-/-</sup> MCAO+DMSO, III. *Lepr*<sup>-/-</sup> MCAO+FPS-ZM1.
