# Supplementary material
Source: publisher site journal article supplement (https://www.dovepress.com/article/476458)
Supplement: Supplementary file 2 [file 476458-Supplement-Table-2.pdf › 476458-Supplement-Table-2.pdf]

**Supplemental Table2-1 Statistical summary and analysis methods**

| Figure reported               | N  |    |        |        | Nor<br>m.<br>dist?<br>* | Homogeneity<br>of<br>Variances?# | Statistic           | Statistic value<br>(df) | p value | Variance<br>source | Post<br>hoc test | Post hoc<br>p | Mean<br>differe<br>nce | Lower<br>95% CI | Upper<br>95% CI |         |
|-------------------------------|----|----|--------|--------|-------------------------|----------------------------------|---------------------|-------------------------|---------|--------------------|------------------|---------------|------------------------|-----------------|-----------------|---------|
|                               | I  | II | III    | IV     |                         |                                  |                     |                         |         |                    |                  |               |                        |                 |                 |         |
| Fig. 1A Zea-Longa score       | 10 | 10 | 1<br>0 | 1<br>0 | No                      | No                               | Kruskal-Wallis test | KW=35.75                | <0.0001 | Difference         |                  |               |                        |                 |                 |         |
|                               |    |    |        |        |                         |                                  |                     |                         |         |                    | A VS B           | Dunn's        | 0.0026                 | -17             |                 |         |
|                               |    |    |        |        |                         |                                  |                     |                         |         |                    | A VS C           | Dunn's        | > 0.9999               | 0.000           |                 |         |
|                               |    |    |        |        |                         |                                  |                     |                         |         |                    | A VS D           | Dunn's        | < 0.0001               | -23             |                 |         |
|                               |    |    |        |        |                         |                                  |                     |                         |         |                    | B VS C           | Dunn's        | 0.0026                 | 17              |                 |         |
|                               |    |    |        |        |                         |                                  |                     |                         |         |                    | B VS D           | Dunn's        | > 0.9999               | -6              |                 |         |
| Fig. 1D TTC staining          | 6  | 6  | 6      | 6      | Yes                     | No                               | one-way ANOVA       | F(3,20)=290.7           | <0.0001 | Difference         |                  |               |                        |                 |                 |         |
|                               |    |    |        |        |                         |                                  |                     |                         |         |                    | A VS B           | Tukey         | < 0.0001               | -1              | -1.176          | -0.8236 |
|                               |    |    |        |        |                         |                                  |                     |                         |         |                    | A VS C           | Tukey         | > 0.9999               | 0.000           | -0.1764         | 0.1764  |
|                               |    |    |        |        |                         |                                  |                     |                         |         |                    | A VS D           | Tukey         | < 0.0001               | -1.525          | -1.701          | -1.348  |
|                               |    |    |        |        |                         |                                  |                     |                         |         |                    | B VS C           | Tukey         | < 0.0001               | 1               | 0.8236          | 1.176   |
|                               |    |    |        |        |                         |                                  |                     |                         |         |                    | B VS D           | Tukey         | < 0.0001               | -0.524          | -0.7012         | -0.3485 |
| Fig. 2A Western blot(GSDMD)   | 4  | 4  | 4      | 4      | Yes                     | Yes                              | one-way ANOVA       | F (3, 12) = 178.6       | <0.001  | Difference         |                  |               |                        |                 |                 |         |
|                               |    |    |        |        |                         |                                  |                     |                         |         |                    | A VS B           | Tukey         | < 0.0001               | -0.628<br>2     | -0.7999         | 0.4564  |
|                               |    |    |        |        |                         |                                  |                     |                         |         |                    | A VS C           | Tukey         | 0.4649                 | -0.087          | -0.2587         | 0.0847  |
|                               |    |    |        |        |                         |                                  |                     |                         |         |                    | A VS D           | Tukey         | < 0.0001               | -1.18           | -1.352          | -1.008  |
|                               |    |    |        |        |                         |                                  |                     |                         |         |                    | B VS C           | Tukey         | < 0.0001               | 0.5412          | 0.3694          | 0.7129  |
|                               |    |    |        |        |                         |                                  |                     |                         |         |                    | B VS D           | Tukey         | < 0.0001               | -0.551<br>8     | -0.7235         | -0.3801 |
| Fig. 2A Western blot(GSDMD-N) | 3  | 3  | 3      | 3      | Yes                     | Yes                              | one-way ANOVA       | F (3, 8) = 69           | <0.001  | Difference         |                  |               |                        |                 |                 |         |
|                               |    |    |        |        |                         |                                  |                     |                         |         |                    | A VS B           | Tukey         | 0.0006                 | -0.664<br>1     | -0.9764         | 0.3519  |
|                               |    |    |        |        |                         |                                  |                     |                         |         |                    | A VS C           | Tukey         | 0.9918                 | -0.027<br>26    | -0.3395         | 0.2850  |
|                               |    |    |        |        |                         |                                  |                     |                         |         |                    | A VS D           | Tukey         | < 0.0001               | -1.198          | -1.51           | -0.8855 |
|                               |    |    |        |        |                         |                                  |                     |                         |         |                    | B VS C           | Tukey         | 0.0008                 | 0.6369          | 0.3246          | 0.9491  |
|                               |    |    |        |        |                         |                                  |                     |                         |         |                    | B VS D           | Tukey         | 0.0026                 | -0.533<br>7     | -0.8459         | -0.2214 |
| Fig. 2B qRT-PCR(GSDMD)        | 4  | 4  | 4      | 4      | Yes                     | Yes                              | one-way ANOVA       | F (3, 12) = 592         | <0.001  | Difference         |                  |               |                        |                 |                 |         |
|                               |    |    |        |        |                         |                                  |                     |                         |         |                    | A VS B           | Tukey         | < 0.0001               | -1.221          | -1.552          | -0.8898 |

|                                                |   |   |   |   |     |     |               |                  |         |            |        |       |          |          |         |         |
|------------------------------------------------|---|---|---|---|-----|-----|---------------|------------------|---------|------------|--------|-------|----------|----------|---------|---------|
|                                                |   |   |   |   |     |     |               |                  |         |            | A VS C | Tukey | 0.1189   | -0.2736  | -0.6045 | 0.0573  |
|                                                |   |   |   |   |     |     |               |                  |         |            | A VS D | Tukey | < 0.0001 | -4.188   | -4.519  | -3.857  |
|                                                |   |   |   |   |     |     |               |                  |         |            | B VS C | Tukey | < 0.0001 | 0.9471   | 0.6162  | 1.278   |
|                                                |   |   |   |   |     |     |               |                  |         |            | B VS D | Tukey | < 0.0001 | -2.967   | -3.298  | -2.636  |
|                                                |   |   |   |   |     |     |               |                  |         |            | C VS D | Tukey | < 0.0001 | -3.914   | -4.245  | -3.683  |
| Fig. 2D<br>Immunofluorescence staining (GSDMD) | 5 | 5 | 5 | 5 | Yes | Yes | one-way ANOVA | $F(3,16) = 1180$ | <0.0001 | Difference |        |       |          |          |         |         |
|                                                |   |   |   |   |     |     |               |                  |         |            | A VS B | Tukey | < 0.0001 | -12.8    | -14.42  | -11.18  |
|                                                |   |   |   |   |     |     |               |                  |         |            | A VS C | Tukey | 0.5090   | -0.8     | -2.418  | 0.8184  |
|                                                |   |   |   |   |     |     |               |                  |         |            | A VS D | Tukey | < 0.0001 | -29.4    | -31.02  | -27.78  |
|                                                |   |   |   |   |     |     |               |                  |         |            | B VS C | Tukey | < 0.0001 | 12       | 10.38   | 13.62   |
|                                                |   |   |   |   |     |     |               |                  |         |            | B VS D | Tukey | < 0.0001 | -16.6    | -18.22  | -14.98  |
|                                                |   |   |   |   |     |     |               |                  |         |            | C VS D | Tukey | < 0.0001 | -28.6    | -30.22  | -26.98  |
| Fig. 4A Western blot(NLRP3)                    | 3 | 3 | 3 | 3 | Yes | Yes | one-way ANOVA | $F(3, 8) = 139$  | <0.001  | Difference |        |       |          |          |         |         |
|                                                |   |   |   |   |     |     |               |                  |         |            | A VS B | Tukey | < 0.0001 | -0.3382  | -0.4152 | 0.2612  |
|                                                |   |   |   |   |     |     |               |                  |         |            | A VS C | Tukey | 0.0341   | -0.0835  | -0.1606 | -0.0065 |
|                                                |   |   |   |   |     |     |               |                  |         |            | A VS D | Tukey | < 0.0001 | -0.42    | -0.4970 | -0.3430 |
|                                                |   |   |   |   |     |     |               |                  |         |            | B VS C | Tukey | < 0.0001 | 0.2546   | 0.1776  | 0.3317  |
|                                                |   |   |   |   |     |     |               |                  |         |            | B VS D | Tukey | 0.0379   | -0.0817  | -0.1588 | -0.0047 |
|                                                |   |   |   |   |     |     |               |                  |         |            | C VS D | Tukey | < 0.0001 | -0.3364  | -0.4134 | -0.2594 |
| Fig. 4A Western blot(Pro-caspase1)             | 4 | 4 | 4 | 4 | Yes | Yes | one-way ANOVA | $F(3, 12)=92.23$ | <0.001  | Difference |        |       |          |          |         |         |
|                                                |   |   |   |   |     |     |               |                  |         |            | A VS B | Tukey | < 0.0001 | -0.1448  | -0.1992 | 0.0904  |
|                                                |   |   |   |   |     |     |               |                  |         |            | A VS C | Tukey | 0.6017   | -0.0231  | -0.0774 | -0.0312 |
|                                                |   |   |   |   |     |     |               |                  |         |            | A VS D | Tukey | < 0.0001 | -0.2698  | -0.3241 | -0.2154 |
|                                                |   |   |   |   |     |     |               |                  |         |            | B VS C | Tukey | 0.0001   | 0.1217   | 0.0673  | 0.1761  |
|                                                |   |   |   |   |     |     |               |                  |         |            | B VS D | Tukey | < 0.0001 | -0.12449 | -0.1793 | -0.0705 |
|                                                |   |   |   |   |     |     |               |                  |         |            | C VS D | Tukey | < 0.0001 | -0.2466  | -0.3010 | -0.1923 |
| Fig. 4A Western blot(Cleaved caspase1)         | 4 | 4 | 4 | 4 | Yes | No  | one-way ANOVA | $F(3, 12)=584.8$ | <0.001  | Difference |        |       |          |          |         |         |
|                                                |   |   |   |   |     |     |               |                  |         |            | A VS B | Tukey | < 0.0001 | -0.4422  | -0.5111 | -0.3733 |
|                                                |   |   |   |   |     |     |               |                  |         |            | A VS C | Tukey | 0.4546   | -0.0353  | -0.1043 | 0.0335  |
|                                                |   |   |   |   |     |     |               |                  |         |            | A VS D | Tukey | < 0.0001 | -0.8441  | -0.9131 | -0.7752 |
|                                                |   |   |   |   |     |     |               |                  |         |            | B VS C | Tukey | < 0.0001 | 0.4069   | 0.3379  | 0.4758  |
|                                                |   |   |   |   |     |     |               |                  |         |            | B VS D | Tukey | < 0.0001 | -0.401   | -0.4708 | -0.3330 |

|                                            |   |   |   |   |     |     |               |                  |         |            |       |          |                  |         |         |
|--------------------------------------------|---|---|---|---|-----|-----|---------------|------------------|---------|------------|-------|----------|------------------|---------|---------|
| Fig. 4A Western blot(IL-18)                | 4 | 4 | 4 | 4 | Yes | No  | one-way ANOVA | $F(3, 12)=172.1$ | <0.001  | C VS D     | Tukey | < 0.0001 | 9<br>-0.808<br>8 | -0.8777 | -0.7399 |
|                                            |   |   |   |   |     |     |               |                  |         | Difference |       |          |                  |         |         |
|                                            |   |   |   |   |     |     |               |                  |         | A VS B     | Tukey | < 0.0001 | -0.151<br>6      | -0.1907 | -0.1124 |
|                                            |   |   |   |   |     |     |               |                  |         | A VS C     | Tukey | 0.0640   | -0.037<br>24     | -0.0763 | 0.0018  |
|                                            |   |   |   |   |     |     |               |                  |         | A VS D     | Tukey | < 0.0001 | -0.270<br>7      | -0.3098 | -0.2316 |
|                                            |   |   |   |   |     |     |               |                  |         | B VS C     | Tukey | < 0.0001 | 0.1143           | 0.07521 | 0.1535  |
|                                            |   |   |   |   |     |     |               |                  |         | B VS D     | Tukey | < 0.0001 | -0.119<br>1      | -0.1583 | -0.0800 |
| Fig. 4A Western blot( IL-1 $\beta$ )       | 4 | 4 | 4 | 4 | Yes | No  | one-way ANOVA | $F(3, 12)=229.2$ | <0.001  | C VS D     | Tukey | < 0.0001 | -0.233<br>5      | -0.2726 | -0.1943 |
|                                            |   |   |   |   |     |     |               |                  |         | Difference |       |          |                  |         |         |
|                                            |   |   |   |   |     |     |               |                  |         | A VS B     | Tukey | < 0.0001 | -0.352<br>2      | -0.4344 | -0.2701 |
|                                            |   |   |   |   |     |     |               |                  |         | A VS C     | Tukey | 0.9277   | -0.016<br>81     | -0.0989 | 0.0653  |
|                                            |   |   |   |   |     |     |               |                  |         | A VS D     | Tukey | < 0.0001 | -0.618<br>7      | -0.7008 | -0.5365 |
|                                            |   |   |   |   |     |     |               |                  |         | B VS C     | Tukey | < 0.0001 | 0.3354           | 0.2532  | 0.4176  |
|                                            |   |   |   |   |     |     |               |                  |         | B VS D     | Tukey | < 0.0001 | -0.266<br>5      | -0.3486 | -0.1843 |
| Fig. 4B qRT-PCR NLRP3 mRNA                 | 4 | 4 | 4 | 4 | Yes | No  | one-way ANOVA | $F(3, 12)=108.1$ | <0.001  | C VS D     | Tukey | < 0.0001 | -0.601<br>9      | -0.6840 | -0.5197 |
|                                            |   |   |   |   |     |     |               |                  |         | Difference |       |          |                  |         |         |
|                                            |   |   |   |   |     |     |               |                  |         | A VS B     | Tukey | 0.0013   | -1.131           | -1.792  | -0.4693 |
|                                            |   |   |   |   |     |     |               |                  |         | A VS C     | Tukey | 0.3086   | -0.406<br>8      | -1.068  | 0.2546  |
|                                            |   |   |   |   |     |     |               |                  |         | A VS D     | Tukey | < 0.0001 | -3.651           | -4.313  | -2.99   |
|                                            |   |   |   |   |     |     |               |                  |         | B VS C     | Tukey | 0.0307   | 0.7239           | 0.06248 | 1.385   |
|                                            |   |   |   |   |     |     |               |                  |         | B VS D     | Tukey | < 0.0001 | -2.52            | -3.182  | -1.859  |
| Fig. 4D Immunofluorescence staining(NLRP3) | 5 | 5 | 5 | 5 | Yes | Yes | one-way ANOVA | $F(3, 16)=1398$  | <0.0001 | C VS D     | Tukey | < 0.0001 | -3.244           | -3.906  | -2.583  |
|                                            |   |   |   |   |     |     |               |                  |         | Difference |       |          |                  |         |         |
|                                            |   |   |   |   |     |     |               |                  |         | A VS B     | Tukey | < 0.0001 | -12.8            | -14.37  | -11.23  |
|                                            |   |   |   |   |     |     |               |                  |         | A VS C     | Tukey | 0.9999   | -0.000           | -1.567  | 1.567   |
|                                            |   |   |   |   |     |     |               |                  |         | A VS D     | Tukey | < 0.0001 | -30.6            | -32,17  | -29.03  |
|                                            |   |   |   |   |     |     |               |                  |         | B VS C     | Tukey | < 0.0001 | 12.8             | 11.23   | 14.37   |
|                                            |   |   |   |   |     |     |               |                  |         | B VS D     | Tukey | < 0.0001 | -17.8            | -19.37  | -16.23  |
| Fig. 6A Western blot( AGEs)                | 3 | 3 | 3 | 3 | Yes | Yes | one-way ANOVA | $F(3, 8)=121.3$  | <0.001  | C VS D     | Tukey | < 0.0001 | -30.6            | -32.17  | -29.03  |
|                                            |   |   |   |   |     |     |               |                  |         | Difference |       |          |                  |         |         |
|                                            |   |   |   |   |     |     |               |                  |         | A VS B     | Tukey | < 0.0001 | -0.891           | -1.171  | -0.6127 |

|                             |       |          |             |         |         |     |               |                  |        |            |                                                  |       |          |                  |         |         |     |               |                  |        |            |        |       |          |             |         |         |
|-----------------------------|-------|----------|-------------|---------|---------|-----|---------------|------------------|--------|------------|--------------------------------------------------|-------|----------|------------------|---------|---------|-----|---------------|------------------|--------|------------|--------|-------|----------|-------------|---------|---------|
| Fig. 6A Western blot( RAGE) | 4     | 4        | 4           | 4       | Yes     | Yes | one-way ANOVA | $F(3, 12)=25.29$ | <0.001 | Difference | A VS C                                           | Tukey | 0.0012   | 8<br>-0.535<br>9 | -0.8150 | -0.2569 |     |               |                  |        |            |        |       |          |             |         |         |
|                             |       |          |             |         |         |     |               |                  |        |            | A VS D                                           | Tukey | < 0.0001 | -1.618           | -1.897  | -1.339  |     |               |                  |        |            |        |       |          |             |         |         |
|                             |       |          |             |         |         |     |               |                  |        |            | B VS C                                           | Tukey | 0.0149   | 0.3558           | 0.07675 | 0.6349  |     |               |                  |        |            |        |       |          |             |         |         |
|                             |       |          |             |         |         |     |               |                  |        |            | B VS D                                           | Tukey |          | -0.726<br>4      | -1.005  | -0.4473 |     |               |                  |        |            |        |       |          |             |         |         |
|                             |       |          |             |         |         |     |               |                  |        |            | C VS D                                           | Tukey | < 0.0001 | -1.082           | -1.361  | -0.8032 |     |               |                  |        |            |        |       |          |             |         |         |
|                             |       |          |             |         |         |     |               |                  |        |            | A VS B                                           | Tukey | 0.0016   | -0.472<br>5      | -0.7538 | -0.1912 |     |               |                  |        |            |        |       |          |             |         |         |
|                             |       |          |             |         |         |     |               |                  |        |            | A VS C                                           | Tukey | 0.0337   | -0.302<br>9      | -0.5842 | -0.0215 |     |               |                  |        |            |        |       |          |             |         |         |
|                             |       |          |             |         |         |     |               |                  |        |            | A VS D                                           | Tukey | < 0.0001 | -0.807<br>4      | -1.089  | -0.526  |     |               |                  |        |            |        |       |          |             |         |         |
|                             |       |          |             |         |         |     |               |                  |        |            | B VS C                                           | Tukey | 0.3243   | 0.1696           | -0.1117 | 0.4509  |     |               |                  |        |            |        |       |          |             |         |         |
|                             |       |          |             |         |         |     |               |                  |        |            | B VS D                                           | Tukey | 0.0186   | -0.334<br>9      | -0.6162 | -0.0535 |     |               |                  |        |            |        |       |          |             |         |         |
| Fig. 6B qRT-PCR RAGE mRNA   | 4     | 4        | 4           | 4       | Yes     | No  | one-way ANOVA | $F(3, 12)=449.2$ | <0.001 | Difference | C VS D                                           | Tukey | 0.0009   | -0.504<br>5      | -0.7858 | -0.2232 |     |               |                  |        |            |        |       |          |             |         |         |
|                             |       |          |             |         |         |     |               |                  |        |            | A VS B                                           | Tukey | < 0.0001 | -3.757           | -4.249  | -3.264  |     |               |                  |        |            |        |       |          |             |         |         |
|                             |       |          |             |         |         |     |               |                  |        |            | A VS C                                           | Tukey | < 0.0001 | -1.128           | -1.621  | -0.6356 |     |               |                  |        |            |        |       |          |             |         |         |
|                             |       |          |             |         |         |     |               |                  |        |            | A VS D                                           | Tukey | < 0.0001 | -5.481           | -5.974  | -4.989  |     |               |                  |        |            |        |       |          |             |         |         |
|                             |       |          |             |         |         |     |               |                  |        |            | B VS C                                           | Tukey | < 0.0001 | 2.628            | 2.135   | 3.121   |     |               |                  |        |            |        |       |          |             |         |         |
|                             |       |          |             |         |         |     |               |                  |        |            | B VS D                                           | Tukey | < 0.0001 | -1.725           | -2.218  | -1.232  |     |               |                  |        |            |        |       |          |             |         |         |
|                             |       |          |             |         |         |     |               |                  |        |            | C VS D                                           | Tukey | < 0.0001 | -4.353           | -4.846  | -3.86   |     |               |                  |        |            |        |       |          |             |         |         |
|                             |       |          |             |         |         |     |               |                  |        |            | Fig. 6D Immunohistochemical staining of RAGE IOD | 5     | 5        | 5                | 5       | Yes     | Yes | one-way ANOVA | $F(3, 16)=395.1$ | <0.001 | Difference | A VS B | Tukey | < 0.0001 | -0.144<br>0 | -0.1621 | -0.1259 |
|                             |       |          |             |         |         |     |               |                  |        |            |                                                  |       |          |                  |         |         |     |               |                  |        |            | A VS C | Tukey | < 0.0001 | -0.074<br>9 | -0.0920 | 0.0559  |
|                             |       |          |             |         |         |     |               |                  |        |            |                                                  |       |          |                  |         |         |     |               |                  |        |            | A VS D | Tukey | < 0.0001 | -0.206      | -0.2241 | -0.1879 |
| B VS C                      | Tukey | < 0.0001 | 0.0700<br>0 | 0.05191 | 0.0880  |     |               |                  |        |            |                                                  |       |          |                  |         |         |     |               |                  |        |            |        |       |          |             |         |         |
| B VS D                      | Tukey | < 0.0001 | -0.062<br>9 | -0.0800 | -0.0439 |     |               |                  |        |            |                                                  |       |          |                  |         |         |     |               |                  |        |            |        |       |          |             |         |         |
| C VS D                      | Tukey | < 0.0001 | -0.132      | -0.1501 | -0.1139 |     |               |                  |        |            |                                                  |       |          |                  |         |         |     |               |                  |        |            |        |       |          |             |         |         |

Note: I . WT Sham, II . WT MCAO, III. *Lepr*<sup>-/-</sup> Sham, IV. *Lepr*<sup>-/-</sup> MCAO. \* Shapiro-Wilk test of normality. #Levene Statistic test of homogeneity of variances.

### Supplemental Table2-2 Statistical summary and analysis methods

| Figure reported                        | N  |    |     | Nor<br>m.<br>dist?<br>* | Homogeneity of<br>Variances?# | Statistic              | Statistic value<br>(df) | p<br>valu<br>e | Variance<br>source | Post<br>hoc<br>test | Post<br>hoc p | Mean<br>differen<br>ce | Lower<br>95%<br>CI | Uppe<br>r<br>95%<br>CI |
|----------------------------------------|----|----|-----|-------------------------|-------------------------------|------------------------|-------------------------|----------------|--------------------|---------------------|---------------|------------------------|--------------------|------------------------|
|                                        | I  | II | III |                         |                               |                        |                         |                |                    |                     |               |                        |                    |                        |
| Fig. 5A Zea-Longa score                | 10 | 10 | 10  | No                      | No                            | Kruskal-Wallis<br>test | KW=12.567               | 0.001<br>9     | Difference         |                     |               |                        |                    |                        |
|                                        |    |    |     |                         |                               |                        |                         |                | A VS B             | Dunn's              | >             | -1.25                  |                    |                        |
|                                        |    |    |     |                         |                               |                        |                         |                | A VS C             | Dunn's              | 0.012         | 10.25                  |                    |                        |
|                                        |    |    |     |                         |                               |                        |                         |                | B VS C             | Dunn's              | 0.0037        | 11.5                   |                    |                        |
| Fig. 5C Western blot(Pro-caspase1)     | 4  | 4  | 4   | Yes                     | Yes                           | one-way ANOVA          | F (2, 9) =188.4         | <0.0<br>01     | Difference         |                     |               |                        |                    |                        |
|                                        |    |    |     |                         |                               |                        |                         |                | A VS B             | Tukey               | 0.1656        | 0.0857                 | -0.033<br>4        | 0.205<br>0             |
|                                        |    |    |     |                         |                               |                        |                         |                | A VS C             | Tukey               | <             | 0.7568                 | 0.6376             | 0.876                  |
|                                        |    |    |     |                         |                               |                        |                         |                | B VS C             | Tukey               | <             | 0.6710                 | 0.5518             | 0.790<br>2             |
| Fig. 5C Western blot(Cleaved caspase1) | 3  | 3  | 3   | Yes                     | Yes                           | one-way ANOVA          | F (2, 6) =554           | <0.0<br>01     | Difference         |                     |               |                        |                    |                        |
|                                        |    |    |     |                         |                               |                        |                         |                | A VS B             | Tukey               | 0.7133        | -0.0254                | -0.122<br>2        | 0.071<br>3             |
|                                        |    |    |     |                         |                               |                        |                         |                | A VS C             | Tukey               | <             | 0.78963                | 0.7995             | 0.993<br>1             |
|                                        |    |    |     |                         |                               |                        |                         |                | B VS C             | Tukey               | <             | 0.6710                 | 0.8249             | 1.019                  |
| Fig. 5C Western blot(IL-18)            | 4  | 4  | 4   | Yes                     | Yes                           | one-way ANOVA          | F (2, 9) =27.7          | <0.0<br>01     | Difference         |                     |               |                        |                    |                        |
|                                        |    |    |     |                         |                               |                        |                         |                | A VS B             | Tukey               | 0.9675        | 0.02615                | -0.271<br>7        | 0.324<br>0             |
|                                        |    |    |     |                         |                               |                        |                         |                | A VS C             | Tukey               | 0.0003        | 0.7003                 | 0.4025             | 0.998<br>1             |
|                                        |    |    |     |                         |                               |                        |                         |                | B VS C             | Tukey               | 0.0004        | 0.6742                 | 0.3764             | 0.972<br>0             |
| Fig. 5C Western blot(IL-1 β )          | 3  | 3  | 3   | Yes                     | Yes                           | one-way ANOVA          | F (2, 6) =22.17         | <0.0<br>01     | Difference         |                     |               |                        |                    |                        |
|                                        |    |    |     |                         |                               |                        |                         |                | A VS B             | Tukey               | 0.8954        | 0.03344                | -0.193<br>7        | 0.260<br>5             |
|                                        |    |    |     |                         |                               |                        |                         |                | A VS C             | Tukey               | 0.0024        | 0.4426                 | 0.2155             | 0.669<br>7             |
|                                        |    |    |     |                         |                               |                        |                         |                | B VS C             | Tukey               | 0.0036        | 0.4091                 | 0.1820             | 0.636<br>2             |
| Fig. 5C Western blot(GSDMD)            | 3  | 3  | 3   | Yes                     | Yes                           | one-way ANOVA          | F (2, 6) =230.2         | <0.0<br>01     | Difference         |                     |               |                        |                    |                        |
|                                        |    |    |     |                         |                               |                        |                         |                | A VS B             | Tukey               | 0.5948        | -0.0772<br>1           | -0.310<br>5        | 0.156<br>1             |
|                                        |    |    |     |                         |                               |                        |                         |                | A VS C             | Tukey               | <             | 1.373                  | 1.139              | 1.606                  |

|                               |   |   |   |     |     |               |                   |          |            |       |           |      |        |       |        |          |         |        |
|-------------------------------|---|---|---|-----|-----|---------------|-------------------|----------|------------|-------|-----------|------|--------|-------|--------|----------|---------|--------|
| Fig. 5C Western blot(GSDMD-N) | 3 | 3 | 3 | Yes | Yes | one-way ANOVA | $F(2, 6) = 28.27$ | $<0.001$ | B VS C     | Tukey | $<0.0001$ | 1.45 | 1.217  | 1.683 |        |          |         |        |
|                               |   |   |   |     |     |               |                   |          | Difference |       |           |      | A VS B | Tukey | 0.8855 | -0.03534 | -0.2638 | 0.1931 |
|                               |   |   |   |     |     |               |                   |          |            |       |           |      | A VS C | Tukey | 0.0019 | 0.4663   | 0.2378  | 0.6947 |
|                               |   |   |   |     |     |               |                   |          |            |       |           |      | B VS C | Tukey | 0.0013 | 0.5016   | 0.2731  | 0.7301 |

**Note:** I . *Lepr*<sup>-/-</sup> MCAO, II . DMSO+ *Lepr*<sup>-/-</sup> MCAO, III . MCC950+ *Lepr*<sup>-/-</sup> MCAO. \* Shapiro-Wilk test of normality. #Levene Statistic test of homogeneity of variances.

### Supplemental Table2-3 Statistical summary and analysis methods

| Figure reported                    | N  |    |     | Norm. dist?* | Homogeneity of Variances?# | Statistic           | Statistic value (df) | p value  | Variance source | Post hoc test | Post hoc p | Mean difference | Lower 95% CI | Upper 95% CI |
|------------------------------------|----|----|-----|--------------|----------------------------|---------------------|----------------------|----------|-----------------|---------------|------------|-----------------|--------------|--------------|
|                                    | I  | II | III |              |                            |                     |                      |          |                 |               |            |                 |              |              |
| Fig. 7A Zea-Longa score            | 10 | 10 | 10  | No           | No                         | Kruskal-Wallis test | KW=13.596            | 0.0011   | Difference      |               |            |                 |              |              |
|                                    |    |    |     |              |                            |                     |                      |          | A VS B          | Dunn's        | $>0.9999$  | 0.000           |              |              |
|                                    |    |    |     |              |                            |                     |                      |          | A VS C          | Dunn's        | 0.0042     | 11.4            |              |              |
|                                    |    |    |     |              |                            |                     |                      |          | B VS C          | Dunn's        | 0.0042     | 11.4            |              |              |
| Fig. 7C Western blot(NLRP3)        | 4  | 4  | 4   | Yes          | Yes                        | one-way ANOVA       | $F(2, 9) = 153.7$    | $<0.001$ | Difference      |               |            |                 |              |              |
|                                    |    |    |     |              |                            |                     |                      |          | A VS B          | Tukey         | 0.2417     | -0.05374        | -0.1397      | 0.0322       |
|                                    |    |    |     |              |                            |                     |                      |          | A VS C          | Tukey         | $<0.0001$  | 0.4384          | 0.3524       | 0.5244       |
|                                    |    |    |     |              |                            |                     |                      |          | B VS C          | Tukey         | $<0.0001$  | 0.4921          | 0.4061       | 0.5781       |
| Fig. 7C Western blot(Pro-caspase1) | 4  | 4  | 4   | Yes          | Yes                        | one-way ANOVA       | $F(2, 9) = 224.9$    | $<0.001$ | Difference      |               |            |                 |              |              |
|                                    |    |    |     |              |                            |                     |                      |          | A VS B          | Tukey         | 0.9194     | 0.01097         | -0.0670      | 0.0890       |
|                                    |    |    |     |              |                            |                     |                      |          | A VS C          | Tukey         | $<0.0001$  | 0.5188          | 0.4408       | 0.5969       |
|                                    |    |    |     |              |                            |                     |                      |          | B VS C          | Tukey         | $<0.0001$  | 0.5079          | 0.4298       | 0.5859       |



|                                            |       |         |        |        |        |               |                    |         |            |       |         |          |         |         |
|--------------------------------------------|-------|---------|--------|--------|--------|---------------|--------------------|---------|------------|-------|---------|----------|---------|---------|
| Fig. 8D Immunofluorescence staining(GSDMD) | 5     | 5       | 5      | Yes    | Yes    | one-way ANOVA | $F(2, 12) = 239.5$ | <0.0001 | Difference |       |         |          |         |         |
|                                            |       |         |        |        |        |               |                    |         | A VS C     | Tukey | <0.0001 | 0.6398   | 0.5580  | 0.7215  |
|                                            |       |         |        |        |        |               |                    |         | B VS C     | Tukey | <0.0001 | 0.5901   | 0.5083  | 0.6718  |
|                                            |       |         |        |        |        |               |                    |         | A VS B     | Tukey | 0.1959  | -0.04965 | -0.1213 | 0.02199 |
|                                            |       |         |        |        |        |               |                    |         | A VS C     | Tukey | <0.0001 | 0.4823   | 0.4106  | 0.5539  |
| B VS C                                     | Tukey | <0.0001 | 0.5319 | 0.4603 | 0.6035 |               |                    |         |            |       |         |          |         |         |

**Note:** I. *Lepr*<sup>-/-</sup> MCAO, II. *Lepr*<sup>-/-</sup> MCAO+DMSO, III. *Lepr*<sup>-/-</sup> MCAO+FPS-ZM1. \* Shapiro-Wilk test of normality. #Levene Statistic test of homogeneity of variances.
